# Supplementary material for: Establishing a cell-affinitive interface and spreading space in a 3D hydrogel by introduction of microcarriers and an enzyme
Source: Royal Society of Chemistry journal article supplement (doi:10.1039/c4tb00887a), 2014-08-07
Supplement: c4tb00887a1.pdf [file c4tb00887a1.pdf]

## Supplementary Information

### Establishing of cell-affinitive interface and spreading space in 3D hydrogel by introduction of microcarriers and enzyme

Meiling Zhong, Jing Sun, Dan Wei, Yuda Zhu, Likun Guo, Qingrong Wei, Hongsong Fan\*, Xingdong Zhang

**Table 1** Primers sequences for target genes:

| Symbol                         | Primers                                                    |
|--------------------------------|------------------------------------------------------------|
| GAPDH                          | 5'-GCCAAGGCTGTGGGCAAGGT-3'<br>5'-AGGTGGAGGAGTGGGTGTCG-3'   |
| Core binding factor $\alpha 1$ | 5'-CTCTACTATGGCACTTCGTCAG-3'<br>5'-GCTTCCATCAGCGTCAACAC-3' |
| Bone morphogenetic protein-2   | 5'-TTACTGCCACGGAGAATGCC-3'<br>5'-CCCACAACCCTCCACAACCA-3'   |
| Osteocalcin                    | 5'-GAGGGCAGCGAGGTAGTGAA-3'<br>5'-CCTCCTGAAAGCCGATGTGGT-3'  |
| Collagen type I                | 5'-CACACGTCTCGGTCATGGTA-3'<br>5'-AAGAGGAAGGCCAAGTCGAG3'    |

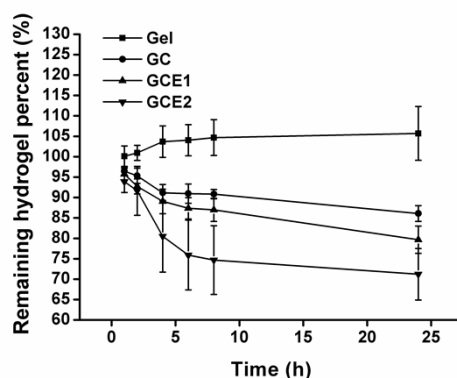

**Fig. S1** The degradation property of hydrogels as a function of incubation time in PBS at pH 7.4 and 37°C. Data are presented as mean  $\pm$  standard deviation (n=3).

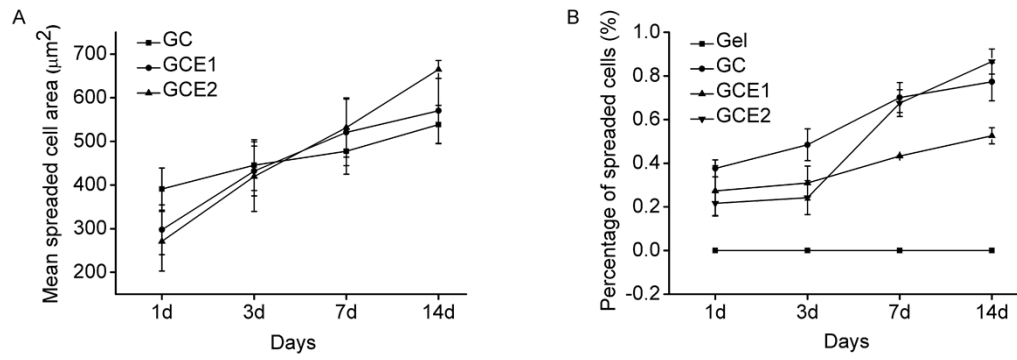

16

17 **Fig. S2** Quantification of area and percentage of spread cells in various hydrogels.

18

19

20

21

22
